# Supplementary material for: Heat-moisture and acid treatments can increase levels of resistant starch in arrowroot starch without adversely affecting its prebiotic activity in human colon microbiota
Source: Royal Society of Chemistry journal article supplement (doi:10.1039/d4fo00711e), 2024-01-01
Supplement: d4fo00711e1.pdf [file d4fo00711e1.pdf]

**Supplemental 1:** Characteristic of the particle size of native, heat-moisture and citric acid treated arrowroot starch.

|              | $D_{50}$ [ $\mu\text{m}$ ]  | $D_{(4,3)}$ [ $\mu\text{m}$ ] | $D_{(3,2)}$ [ $\mu\text{m}$ ] |
|--------------|-----------------------------|-------------------------------|-------------------------------|
| ARS          | $14.2 \pm 0.2$ <sup>f</sup> | $14.7 \pm 0.2$ <sup>d</sup>   | $7.8 \pm 0.1$ <sup>e</sup>    |
| 80 °C_16h    | $30.7 \pm 1.6$ <sup>b</sup> | $38.3 \pm 2.4$ <sup>b</sup>   | $14.5 \pm 0.6$ <sup>b</sup>   |
| 100 °C_1h    | $33.2 \pm 2.5$ <sup>a</sup> | $42.6 \pm 3.0$ <sup>a</sup>   | $15.6 \pm 0.8$ <sup>a</sup>   |
| 120 °C_30min | $34.6 \pm 0.8$ <sup>a</sup> | $44.4 \pm 2.0$ <sup>a</sup>   | $16.1 \pm 0.3$ <sup>a</sup>   |
| 0M_CA        | $30.2 \pm 0.5$ <sup>b</sup> | $42.6 \pm 1.4$ <sup>a</sup>   | $14.8 \pm 0.3$ <sup>b</sup>   |
| 0.2M_CA      | $27.1 \pm 1.1$ <sup>c</sup> | $43.0 \pm 1.4$ <sup>a</sup>   | $13.5 \pm 0.3$ <sup>c</sup>   |
| 0.4M_CA      | $24.3 \pm 1.7$ <sup>d</sup> | $37.8 \pm 3.9$ <sup>b</sup>   | $12.5 \pm 0.7$ <sup>d</sup>   |
| 0.6M_CA      | $22.5 \pm 1.3$ <sup>e</sup> | $30.9 \pm 1.7$ <sup>c</sup>   | $11.9 \pm 0.4$ <sup>d</sup>   |

Mean  $\pm$  SD is calculated from triplicate measurements.

Values with different letters in the same column are significantly different ( $p < 0.05$ ).

$D_{50}$ : median diameter;  $D_{(4,3)}$ : particle diameter of volume;  $D_{(3,2)}$ : particle diameter of surface area.

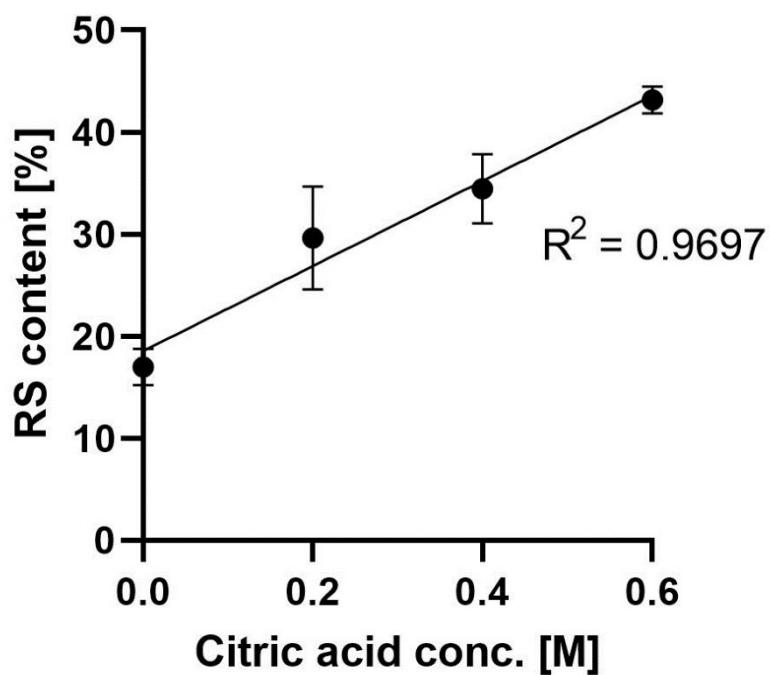

**Supplemental 2:** Pearson correlation coefficient between citric acid concentrations to RS content.

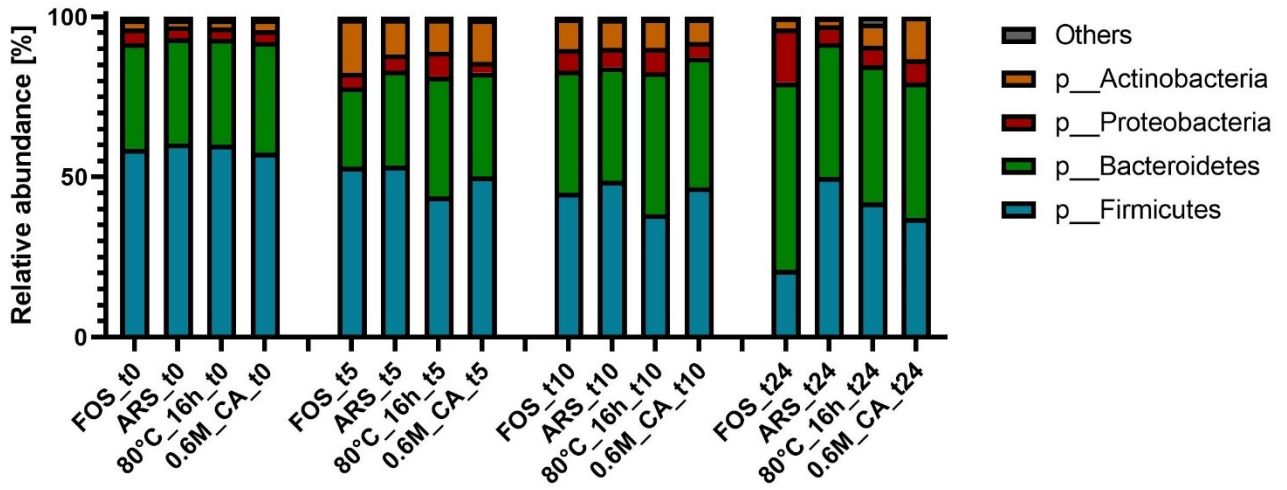

**Supplemental 3:** Relative abundance plot of the gut microbial taxonomic composition at the phylum level after 24h of RS isolated from native and treated ARS versus FOS (positive control).
